# Supplementary material for: Transcriptome Profiling Reveals Effects of Drought Stress on Gene Expression in Diploid Potato Genotype P3-198
Source: PubMed Central journal article supplement (PMC6413097; doi:10.3390/ijms20040852), 2019-02-15
Supplement: ijms-20-00852-s001.pdf [file ijms-20-00852-s001.pdf]

**Table S1.** Basic summary of RNA-sequencing results.

| Samples                    | Total reads | Total bases (G) | Mapped reads        | Unique mapped reads |
|----------------------------|-------------|-----------------|---------------------|---------------------|
| H <sub>2</sub> O_0h_rep1   | 27,390,958  | 8.22            | 22,543,455 (82.30%) | 21,669,975 (79.11%) |
| H <sub>2</sub> O_0h_rep2   | 24,015,524  | 7.20            | 19,846,371 (82.64%) | 19,024,798 (79.22%) |
| H <sub>2</sub> O-0h_rep3   | 22,064,474  | 6.62            | 18,953,986 (85.90%) | 18,180,512 (82.40%) |
| H <sub>2</sub> O-0.5h_rep1 | 21,485,547  | 6.45            | 17,577,376 (81.81%) | 16,867,536 (78.51%) |
| H <sub>2</sub> O-0.5h_rep2 | 21,861,706  | 6.56            | 18,246,281 (83.46%) | 17,541,679 (80.24%) |
| H <sub>2</sub> O-0.5h_rep3 | 23,129,046  | 6.94            | 19,002,760 (82.16%) | 18,233,250 (78.83%) |
| H <sub>2</sub> O-1h_rep1   | 21,278,804  | 6.38            | 18,169,646 (85.39%) | 17,437,650 (81.95%) |
| H <sub>2</sub> O-1h_rep2   | 23,851,958  | 7.16            | 19,643,588 (82.36%) | 18,835,824 (78.97%) |
| H <sub>2</sub> O-1h_rep3   | 23,261,356  | 6.98            | 19,150,913 (82.33%) | 18,401,103 (79.11%) |
| H <sub>2</sub> O-2h_rep1   | 23,801,719  | 7.14            | 19,482,815 (81.85%) | 18,717,037 (78.64%) |
| H <sub>2</sub> O-2h_rep2   | 27,968,144  | 8.39            | 23,952,815 (85.64%) | 22,908,967 (81.91%) |
| H <sub>2</sub> O-2h_rep3   | 25,599,773  | 7.68            | 21,026,359 (82.13%) | 20,078,257 (78.43%) |
| PEG-0h_rep1                | 25,378,571  | 7.61            | 21,592,176 (85.08%) | 20,778,213 (81.87%) |
| PEG-0h_rep2                | 27,461,776  | 8.24            | 22,508,859 (81.96%) | 21,667,287 (78.90%) |
| PEG-0h_rep3                | 21,329,412  | 6.40            | 18,240,320 (85.52%) | 17,483,542 (81.97%) |
| PEG-0.5h_rep1              | 28,153,931  | 8.45            | 22,999,471 (81.69%) | 220,86,924 (78.45%) |
| PEG-0.5h_rep2              | 25,438,148  | 7.63            | 19,971,358 (78.51%) | 19,127,255 (75.19%) |
| PEG-0.5h_rep3              | 28,715,876  | 8.61            | 23,602,458 (82.19%) | 22,609,075 (78.73%) |
| PEG-1h_rep1                | 30,024,679  | 9.01            | 25,607,964 (85.29%) | 24,575,892 (81.85%) |
| PEG-1h_rep2                | 26,414,784  | 7.92            | 21,408,401 (81.05%) | 20,517,217 (77.67%) |
| PEG-1h_rep3                | 29,580,178  | 8.87            | 25,056,568 (84.71%) | 24,050,366 (81.31%) |
| PEG-2h_rep1                | 27,126,999  | 8.14            | 22,202,260 (81.85%) | 21,205,564 (78.17%) |
| PEG-2h_rep2                | 20,784,648  | 6.24            | 17,778,336 (85.54%) | 17,068,332 (82.12%) |
| PEG-2h_rep3                | 26,254,441  | 7.88            | 21,456,566 (81.73%) | 20,591,615 (78.43%) |

**Table S2.** Transcription factors differentially expressed under PEG treatment.

| TF families | Numbers | Types/Known genes*                                                                                                           |
|-------------|---------|------------------------------------------------------------------------------------------------------------------------------|
| Zinc finger | 31      | C2H2, C3HC4 (RING) type, C2H2L, HD, B-box, Dof, CCT, GDSL-like Lipase/Acylhydrolase, CHP-rich, GATA, CCCH, A20/AN1, AN1/C2H2 |
| MYB         | 19      | MYB1R1, MYB3, MYB34, MYB92, MYB108-1, AS1, DIV2B, DIV3B, RL3                                                                 |
| bHLH        | 13      | bHLH151, Upa20, BEE3                                                                                                         |
| AP2/EREBF   | 13      | TSRF1, ERF054, ERF061, Pti4                                                                                                  |
| WRKY        | 8       | WRKY2, WRKY27                                                                                                                |
| NAC         | 7       | NAC2, NAC10                                                                                                                  |
| bZIP        | 6       | ABRE binding factor (ABF), bZIP1                                                                                             |
| GRF         | 3       | GRF10                                                                                                                        |
| GRAS        | 3       | GRAS4                                                                                                                        |
| HSP         | 3       | HSFA-1, HSFA9                                                                                                                |
| CCAAT       | 2       | CBF/NF-YA3, CBF/NF-YB                                                                                                        |
| TCP         | 1       | TCP20-like                                                                                                                   |
| PAR1        | 1       | PAR1                                                                                                                         |
| JmjC        | 1       | hypoxia-inducible factor 1-alpha inhibitor                                                                                   |

\*: here only listed known genes or gene types.

**Table S3.** Protein kinase genes differentially expressed under drought stress.

|                                                      | <b>Protein kinase families</b>                                   | <b>Numbers</b> | <b>Known genes*</b>               |
|------------------------------------------------------|------------------------------------------------------------------|----------------|-----------------------------------|
|                                                      | leucine-rich repeat receptor-like kinases, LRR-RLK               | 51             | FLS2, SR160, BRI1, BAK1, CLAVATA1 |
|                                                      | Lectin receptor-like kinases, LecRLK                             | 11             | --                                |
| Receptor-like protein kinase, RLK                    | wall-associated receptor kinase, WAK                             | 9              | --                                |
|                                                      | S-receptor-like protein kinase, SPK                              | 7              | S6, SD2-5                         |
|                                                      | receptor-like cytoplasmic kinases, RLCK                          | 4              | Pto, PBS1, CRCK2                  |
|                                                      | lysM domain receptor-like kinase                                 | 2              | LYK4                              |
|                                                      | cysteine-rich receptor-like protein kinase, CRK                  | 2              | CRK3, CRK42                       |
|                                                      | Mitogen-activated protein kinase kinase, MAPKKK                  | 6              | --                                |
|                                                      | Histidine kinase, HK                                             | 4              | --                                |
|                                                      | CBL-interacting protein kinase, CIPK                             | 3              | ACRE216, CIPK13, CIPK16           |
|                                                      | Cyclin-dependent kinases, CDK                                    | 3              | --                                |
|                                                      | Phosphatidylinositol 4-phosphate 5-kinase, P4P5K                 | 2              | --                                |
|                                                      | Sucrose non-fermenting 1 (SNF1) -related protein kinase 2, SnRK2 | 2              | SNF4                              |
| --: no known genes. *: here only listed known genes. |                                                                  |                |                                   |

**Table S4.** Differentially expression genes encoding redox regulation-related proteins under drought stress.

| Gene ID              | Ath ID    | FPKM_0 h | FPKM_0.5 h | FPKM_1 h | FPKM_2 h | Description                                         |
|----------------------|-----------|----------|------------|----------|----------|-----------------------------------------------------|
| PGSC0003DMG400003645 | --        | 6.43     | 7.14       | 4.30     | 3.34     | Ascorbate peroxidase                                |
| PGSC0003DMG400002703 | AT3G52880 | 99.98    | 110.04     | 136.63   | 202.78   | Monodehydroascorbate reductase                      |
| PGSC0003DMG400016223 | AT2G22420 | 0.94     | 0.87       | 1.36     | 3.71     | Peroxidase 17                                       |
| PGSC0003DMG400022341 | AT5G19890 | 0.81     | 1.05       | 0.82     | 2.04     | Suberization-associated anionic peroxidase 2        |
| PGSC0003DMG400022342 | --        | 72.32    | 62.74      | 89.14    | 126.95   | Suberization-associated anionic peroxidase          |
| PGSC0003DMG400024285 | AT4G26010 | 69.98    | 78.96      | 33.78    | 35.72    | Peroxidase 44                                       |
| PGSC0003DMG400032199 | --        | 1.58     | 1.04       | 1.51     | 4.46     | Peroxidase                                          |
| PGSC0003DMG400004822 | AT4G17370 | 5.85     | 6.18       | 12.16    | 11.03    | Oxidoreductase                                      |
| PGSC0003DMG400006940 | --        | 6.57     | 6.74       | 3.26     | 2.84     | Oxidoreductase                                      |
| PGSC0003DMG400011098 | --        | 1.46     | 0.79       | 0.36     | 1.84     | Oxidoreductase                                      |
| PGSC0003DMG400011834 | --        | 2.45     | 2.39       | 1.56     | 0.88     | Oxidoreductase                                      |
| PGSC0003DMG400019973 | AT2G46890 | 1.77     | 1.72       | 1.19     | 0.67     | Oxidoreductase                                      |
| PGSC0003DMG400025962 | --        | 2.64     | 2.12       | 1.38     | 1.01     | Oxidoreductase                                      |
| PGSC0003DMG400032208 | --        | 15.17    | 16.41      | 3.58     | 7.73     | Oxidoreductase, 2OG-Fe(II) oxygenase family protein |
| PGSC0003DMG400015356 | AT4G27440 | 428.02   | 459.05     | 197.09   | 266.21   | NADPH:protochlorophyllide oxidoreductase            |
| PGSC0003DMG400025007 | AT4G27440 | 412.04   | 396.46     | 145.39   | 166.97   | NADPH:protochlorophyllide oxidoreductase            |
| PGSC0003DMG400007786 | AT1G78380 | 2.36     | 3.22       | 4.82     | 5.27     | 2,4-D inducible glutathione S-transferase           |
| PGSC0003DMG400016722 | AT1G02920 | 38.00    | 38.17      | 6.36     | 10.04    | Glutathione S-transferase                           |
| PGSC0003DMG400019728 | AT1G65820 | 53.81    | 61.59      | 81.99    | 104.27   | Microsomal glutathione s-transferase                |
| PGSC0003DMG400031094 | AT1G78380 | 0.62     | 1.02       | 0.53     | 1.71     | Glutathione S-transferase/oxidoreductase            |
| PGSC0003DMG400007405 | AT5G22500 | 7.80     | 6.78       | 9.33     | 27.60    | Acyl CoA reductase                                  |
| PGSC0003DMG400011601 | --        | 2.90     | 5.04       | 4.00     | 6.99     | 2,4-dienoyl-CoA reductase                           |
| PGSC0003DMG400033642 | --        | 11.87    | 10.81      | 24.10    | 29.07    | 2,4-dienoyl-CoA reductase                           |
| PGSC0003DMG400014345 | AT2G29550 | 151.71   | 149.58     | 202.90   | 292.49   | Acyl-CoA synthetases                                |

*Ath*, *Arabidopsis thaliana*; FPKM, Fragments per kilobase of exon per million fragments mapped; -- means non-significant orthologous in *Arabidopsis*.

**Table S5.** Annotations and qRT-PCR primers for 10 randomly selected DEGs.

| <b>Gene ID</b>       | <b>Gene annotation</b>                     | <b>Forward primer (5' - 3')</b> | <b>Reverse primer (5' - 3')</b> |
|----------------------|--------------------------------------------|---------------------------------|---------------------------------|
| PGSC0003DMG400013108 | Metal transporter                          | TGGCAGAACATCCGTGG               | GACTCCGAATCAGACAAACC            |
| PGSC0003DMG400015157 | Receptor kinase                            | GCCTGCCGTGAGTCAAGTT             | CAGAGAAGACCAACGCCGAT            |
| PGSC0003DMG402026767 | Delta 1-pyrroline-5-carboxylate synthetase | GTAACGTCTCACAGCTCCCA            | TCTGACCTACAGCCGCAC              |
| PGSC0003DMG400009213 | Sucrose transport protein                  | AACCAAAGCCTGCGACAT              | GCTCGTTTTCCCGGACT               |
| PGSC0003DMG400025007 | NADPH: protochlorophyllide oxidoreductase  | CCACCACTGACTAGAACGAC            | TAAACCTCCC GCCATAC              |
| PGSC0003DMG400017640 | Homeobox protein                           | GGTTCATCCATAGGCACG              | GATTGTTGAAAGACCAGTAG            |
| PGSC0003DMG401033880 | WRKY transcription factor 27               | GATGTCCTCGTCGTTGT               | TATTTGCCCTGCTCCTCT              |
| PGSC0003DMG400009968 | 25 kDa protein dehydrin                    | CAGCGTAACGTCCGTGT               | GATGGCTTGTTCTGTTCG              |
| PGSC0003DMG400006214 | Caffeoyl-CoA O-methyltransferase 5         | GGCAATGGACATTAACCG              | TCAAGAAGAGGCAAAGCAG             |
| PGSC0003DMG400007624 | Early responsive to dehydration 15         | TGGAGGAAGGTCATCAACAC            | TTCGGGAAGCAAGTCAGC              |
